# Supplementary material for: Comparison of Archaeal and Bacterial Diversity in Methane Seep Carbonate Nodules and Host Sediments, Eel River Basin and Hydrate Ridge, USA
Source: Springer Nature journal article supplement (doi:10.1007/s00248-015-0615-6), 2015-05-06
Supplement: MOESM1 [file 248_2015_615_MOESM1_ESM.docx]

**Supplemental Material: Optimization of nodule cleaning technique**

To optimize the removal of microbial contamination from carbonate nodules, a series of decontamination experiments were carried out using samples from a carbonate slab from the Eel River basin, broken into several ~10 cm3 pieces and sterilized by autoclaving. For each experimental condition tested one carbonate section was aseptically maintained, while the second was placed in a 200-mL turbid *Escherichia coli* culture for several hours. Each pair of sterile and contaminated carbonate were then subjected to one of four conditions: 1) UV sterilization for 0.5 hr per side, 2) 70% ethanol rinsing and flaming, 3) rinsing with 1X PBS buffer, and 4) rinsing with 1X PBS and sonication (Branson sonifier 150, Danbury, CT). Each sample was then powdered with a mortar and pestle that was sterilized by baking overnight at 220 °C. Genomic DNA was extracted from 0.5 g of carbonate powder using an Ultraclean Soil DNA kit (MoBio Laboratories, Carlsbad, CA) following the manufacturer’s protocol, with a few modifications. Specifically, following addition of the first solution, samples were incubated at 65°C for 5 min, vortexed briefly, and placed at 65°C for 5 min for a second time. After adding the MoBio IRS solution samples were placed at 4°C for 5 min. To determine which sterilization protocol removed exterior contamination, genomic DNA was amplified from both the sterile and *E. coli* contaminated carbonate following the PCR protocol discussed below.

A comparison of the four different treatment protocols indicated that the most effective treatment for removing external DNA and cell contamination (i.e. resulting in no 16S rRNA genes amplified from *E. coli* contaminated sample, or from aseptically maintained control) was to rinse the carbonates with 0.2 µm filtered 1X PBS, followed by sonication at 8 watts for 45 s in fresh, sterile 1X PBS. Samples were centrifuged at 4,000*g* for 5 min. Supernatant was removed and nodules were transferred into fresh 1X PBS between sonication treatments. A total of three rinse and sonication steps were carried out. All subsequent carbonate nodule and sediment samples were treated according to the protocol discussed above. Genomic DNA was extracted from ERB and HR sediment and ‘decontaminated’ carbonate samples as described above.

**Supplemental Material: Cloning and Sequencing of four selected samples**

PCR mixtures (25 μl) contained 0.4 μM each of either archaeal specific primers 8F and 958R (DeLong, 1992), or the bacterial primer 27F with a general 1492R primer. Reactions also contained (final concentrations) 1 X 5 Prime HotMaster Taq Buffer with 2.5 mM Mg2+ (Gaithersburg, MD), 0.2 mM each deoxynucleotide triphosphates, and 0.05 U of 5 Prime HotMaster Taq. PCR reactions were carried out according to the protocol: initial denaturation at 94°C for 3 min, followed by 35 cycles for 45 s at 94°C, 54°C, and 72°C, with a final extension of 72°C for 6 min.

PCR products of the correct length were cut out of a 1% agarose gel. Extracted bands were purified using Qiagen’s QIAquick Gel Extraction Kit (Valencia, CA). Purified PCR products were then cloned into a Topo TA cloning kit (Invitrogen, Carlsbad, CA). Clones with the correct insert size were analyzed by restriction fragment length polymorphism (RFLP) using the *HaeIII* restriction enzyme. One representative from each of 35 unique archaeal OTUs was sequenced using a CEQ 8800 Genetic Analysis System from Beckman Coulter (Fullerton, CA). Of these sequenced clones a total of 18 unique, non-chimeric, near full-length archaeal 16S rRNA gene sequences were generated, all of which were 97% or less in similarity. For bacterial libraries, one clone from each of 101 unique OTUs identified by RFLP analysis was sequenced at Laragen, Inc (Los Angeles, CA). Of these sequenced near full-length clones, 35 unique, non-chimeric 16S rRNA phylotypes were recovered, all of which were 97% or less in similarity. For both archaea and bacteria, chimeric sequences were identified with Pintail [1] and Mallard [2]. Non-chimeric, full-length sequences, including closely related sequences in Genbank and cultured representatives, were aligned using SINA from Silva and imported into ARB [3]. Neighbor-joining trees were constructed using the Olsen distance correction, with 1000 replicates. Maximum likelihood trees were also generated in ARB.

**Supplemental Material: References**

1. Ashelford KE, Chuzhanova NA, Fry JC, et al. (2005) At Least 1 in 20 16S rRNA Sequence Records Currently Held in Public Repositories Is Estimated To Contain Substantial Anomalies. Applied and Environmental Microbiology 71:7724–7736. doi: 10.1128/AEM.71.12.7724-7736.2005

2. Ashelford KE, Chuzhanova NA, Fry JC, et al. (2006) New Screening Software Shows that Most Recent Large 16S rRNA Gene Clone Libraries Contain Chimeras. Applied and Environmental Microbiology 72:5734–5741. doi: 10.1128/AEM.00556-06

3. Ludwig W, Strunk O, Westram R, et al. (2004) ARB: a software environment for sequence data. Nucl Acids Res 32:1363–1371. doi: 10.1093/nar/gkh293
